# Supplementary material
Source: HighWire-hosted journal article supplement (https://cmaj.ca/highwire/filestream/75762/field_highwire_adjunct_files/1/190883-res-2-at.pdf)
Supplement: 190883-res-2-at.pdf [file 190883-res-2-at.pdf]

## Appendix 2 (as supplied by the authors): Antibiotics classification

- **Penicillins** (ATC J01C): Amoxicillin, ampicillin, bacampicillin, penicillin, piperacillin, pivampicillin, pivmecillinam, cloxacillin, floxacillin, nafcillin, ticarcillin, tazobactam
- **Non-penicillin  $\beta$ -lactams** (ATC J01D): Cefazolin, cefepime, cefixime, cefotaxime, cefotetan, cefoxitin, cefpodoxime, cefprozil, ceftazidime, ceftizoxime, ceftobiprole, ceftriaxone, cefuroxime, cephalexin, cephalothin, aztreonam, cefaclor, cefadroxil, cefamandole, doripenem, ertapenem, meropenem
- **Macrolides and related antibiotics** (ATC J01F and J01R): Dalbapristin, telithromycin, azithromycin, clarithromycin, clindamycin, erythromycin, lincomycin
- **Other antibiotics** (ATC J01A, J01B, J01G, J01E, J01M and J01X): Minocycline, doxycycline, demeclocycline, rolitetracycline, tetracycline, ciprofloxacin, gatifloxacin, nalidixic acid, gemifloxacin, grepafloxacin, levofloxacin, moxifloxacin, norfloxacin, ofloxacin, trovafloxacin, methenamine, fosfomycin, tedizolid, nitrofurantoin, metronidazole, linezolid, fusidate, fusidic acid, bacitracin, vancomycin, colistin, polymyxin B, telavancin, tobramycin, gentamicin, daptomycin, amikacin, spectinomycin, neomycin, netilmicin, spiramycin, streptomycin, chloramphenicol, trimethoprim, sulfamethoxazole, sulfadiazine, sulfapyridine, sulfisoxazole

Abbreviations: ATC, Anatomical Therapeutic Chemical
